# Supplementary material for: Assessing the sustainability of solvometallurgy for black mass processing – the LEACH (Low-impact Extraction and Assessment of CHemical solvometallurgy) tool
Source: Royal Society of Chemistry journal article supplement (doi:10.1039/d5gc06056g), 2026-01-01
Supplement: d5gc06056g1.pdf [file d5gc06056g1.pdf]

**Assessing the Sustainability of Solvometallurgy for Black Mass Processing – the LEACH  
(Low-impact Extraction and Assessment of CHemical solvometallurgy) Tool**

Alberto Mannu,<sup>1\*</sup> Maria Enrica Di Pietro,<sup>2</sup> Marco Yuri Basilico,<sup>2</sup> Elza Bontempi,<sup>1</sup> Andrea Mele<sup>2</sup>

<sup>a</sup>Department of Chemistry, Materials and Chemical Engineering “G. Natta”, Politecnico di Milano, Via Mancinelli 7, 20131 Milan, Italy

<sup>b</sup>INSTM and Chemistry for Technologies Laboratory, Department of Mechanical and Industrial Engineering, University of Brescia, Via Branze 38, 25123 Brescia, Italy

Corresponding Author: Alberto Mannu, [alberto.mannu@unibs.it](mailto:alberto.mannu@unibs.it)

## Guidelines for LEACH application

### LEACH Scoring guide

#### Step 1. Define the assessment scope

##### 1.1. Select module(s):

- Module 1: Solvent formulation
- Module 2: BM leaching
- Module 3: Overall process (combined score)

##### 1.2. Identify all chemical components, additives, and relevant operational conditions.

#### Step 2. Data collection

##### 2.1 Gather physical/chemical data:

- GHS hazard codes (H-statements)
- Biodegradability and persistence information
- CRM status of reagents
- Market prices of reagents

##### 2.2 Collect process parameters:

- Temperature, reaction time
- Solid-to-liquid ratio
- Selectivity and yield
- PMI and workup steps
- Solvent and reagent recyclability

##### 2.3 Collect regulatory data:

- ADR/RID classification
- Environmental fate (PBT/vPvB status)

#### Step 3. Assign subcategory penalties

##### 3.1 For each module, apply the ranges and penalties in Table 4.

##### 3.2 For each subcategory (economic, technical, safety):

- Identify which range applies
- Assign the corresponding penalty value

##### 3.3 Document the justification for each penalty (data source + rule applied).

#### Step 4. Calculate module scores

##### 4.1 Sum all penalty points within the selected module(s).

##### 4.2 For Modules 1 and 2:

- Lower penalty = more sustainable

#### 4.3 For Module 3 (overall process):

- Final Score = 100 – Total Penalties

#### Step. Interpret results

##### 5.1 Assign qualitative classification:

- $\geq 75$  = ideal / excellent
- 50–75 = acceptable / moderate
- $< 50$  = non-ideal

##### 5.2 Identify high-penalty subcategories as optimisation targets.

##### 5.3 Compare module results to diagnose sustainability bottlenecks.

#### Step 6. Reporting

##### 6.1 Provide a complete table listing:

- Raw data
- Penalty assignment
- Module totals

##### 6.2 Provide justification notes for reproducibility.

##### 6.3 If evaluating multiple processes, normalise categories to compare profiles.

#### LEACH application to an organic-acid hydrometallurgy case<sup>1</sup>

##### Process boundary for scoring.

Aqueous citric acid leachant with 2% v/v H<sub>2</sub>O<sub>2</sub> at 80 °C, 60–150 min; solid/liquid 10 g/250 mL; subsequent filtration and oxalate precipitation for downstream recovery. Target critical metal for Module 2/3 selectivity is Co (to keep consistency with our manuscript's framing).

Table 1. Module 1 — Solvent/Formulation

| Subcategory          | Range chosen                | PP | Rationale                                                                                                                |
|----------------------|-----------------------------|----|--------------------------------------------------------------------------------------------------------------------------|
| Materials cost       | 10–100 €/kg                 | 7  | Lab-scale citric acid/H <sub>2</sub> O <sub>2</sub> bracketed as mid-cost; no BOM reported—kept within LEACH's mid tier. |
| Renewable feedstocks | Partially                   | 5  | Citric acid is bio-based/biodegradable; H <sub>2</sub> O <sub>2</sub> industrial oxidant → “partially renewable.”        |
| CRMs use             | None                        | 0  | No CRMs in the leachant.                                                                                                 |
| T×t (formulation)    | $\leq 25$ °C, $\leq 1$ h    | 0  | Aqueous make-up; no heated blending needed is reported.                                                                  |
| Workup (formulation) | Simple/none                 | 0  | No solvent purification steps stated.                                                                                    |
| Stability            | No degradation reported     | 0  | No instability of the <i>formulated</i> leachant noted.                                                                  |
| Biodegradability     | Components biodegradable    | 0  | Citric acid readily biodegradable; dilute H <sub>2</sub> O <sub>2</sub> decomposes.                                      |
| PMI (formulation)    | $< 10$                      | 0  | Make-up of aqueous solution only.                                                                                        |
| Recyclability        | Not reusable (not reported) | 5  | No solvent reuse loop described.                                                                                         |

| Subcategory        | Range chosen                      | PP | Rationale                                                                                     |
|--------------------|-----------------------------------|----|-----------------------------------------------------------------------------------------------|
| Safety—Intrinsic   | Irritant/oxidizer, non-carcinogen | 1  | Citric acid irritant; 2% H <sub>2</sub> O <sub>2</sub> low-hazard oxidizer; no CMRs reported. |
| Safety—Handling    | PPE cat. 1 (standard lab)         | 0  | Standard goggles/gloves implied.                                                              |
| Safety—Emergency   | Basic first-aid only              | 0  | No special fire/explosion scenarios at 2% H <sub>2</sub> O <sub>2</sub> .                     |
| Environmental fate | Biodegradable/inert               | 0  | As above.                                                                                     |
| Regulatory impact  | Not listed                        | 0  | No DG transport issues at stated concentrations.                                              |

Table 2. BM leaching

| Subcategory         | Range chosen                | PP  | Rationale                                                                                         |
|---------------------|-----------------------------|-----|---------------------------------------------------------------------------------------------------|
| Yield (Co)          | > 90%                       | 0   | Co = 90.12% with 2% H <sub>2</sub> O <sub>2</sub> .                                               |
| Temperature × time  | > 50 °C (≤ 4 h)             | 4   | 80 °C for 60–150 min.                                                                             |
| Workup              | Multiple steps              | 4   | Filtration + downstream oxalate precipitation.                                                    |
| PMI                 | 10–50                       | 2.5 | 10 g solid in ~250 g solution → order-of-magnitude PMI in this band (leach step only).            |
| Recyclability       | Not reusable (not reported) | 5   | No leach liquor recycle/regeneration shown.                                                       |
| Selectivity (to Co) | < 70%                       | 4   | Process co-leaches Ni and Al by design; relative to <i>Co-selective</i> goal this incurs penalty. |
| Safety—Intrinsic    | Irritant/oxidizer           | 1   | Aqueous organic acid + dilute H <sub>2</sub> O <sub>2</sub> ; no CMRs.                            |
| Safety—Handling     | PPE cat. 1–2                | 4   | Acid/oxidizer handling & hot slurry → upgraded PPE.                                               |
| Safety—Emergency    | Basic first-aid             | 0   | No specific fire/spill special measures described at this dilution.                               |
| Environmental fate  | Biodegradable/inert         | 0   | Citric acid aqueous system.                                                                       |
| Regulatory impact   | Not listed                  | 0   | Not a transport-restricted operation as reported.                                                 |

### Module 3 — Overall process (EcoScale logic within LEACH)

(Integrates economic, technical, and safety dimensions across formulation + leaching.)

- Economic (30%): materials cost 7, renewables 5, CRMs 0 → 12 PP.
- Technical (35%): Yield 0; T×t 4; Workup 4; Stability 0; Biodegradability 0; Recyclability 5; Selectivity 4; PMI 2.5 → 19.5 PP.
- Safety (35%): Intrinsic 1; Handling 4; Emergency 0; Fate 0; Regulatory 0 → 5 PP.

Total PP = 12 + 19.5 + 5 = 36.5 → Module 3 Score = 100 – 36.5 = 63.5.

<sup>1</sup> A. Jumari, C.S. Yudha, M. Nizam, E.R. Dyartanti, S.A. Purwanto, Open Engineering, 2022, 12, 485–494.
